# Supplementary material for: Microdroplet Mass Spectrometry Enables Extremely Accelerated Pepsin Digestion of Proteins
Source: PubMed Central journal article supplement (PMC8267842; doi:10.1021/jasms.1c00126), 2021-06-08
Supplement: js1c00126_si_001.pdf [file js1c00126_si_001.pdf]

# Microdroplet Mass Spectrometry Enables Extremely Accelerated Pepsin Digestion of Proteins

Tobias Rainer, Reiner Eidelpes, Martin Tollinger and Thomas Müller\*

Institute of Organic Chemistry and Center for Molecular Biosciences (CMBI), Leopold-Franzens University Innsbruck, 6020 Innsbruck, Austria

\*E-mail: thomas.mueller@uibk.ac.at

## Supporting Information

### Data processing

The obtained full MS raw data (acquisition time 1 min) were averaged, exported as .raw files using Xcalibur Qual Browser 4.1 software (Thermo Scientific, San Jose, CA), and converted to mzML format using the open source software MSconvert V3.0.<sup>1</sup> The open source tool mMass V5.5.0<sup>2</sup> was used for peak picking, in silico protein digestion and peptide identification. The mMass sequence function was used to calculate all possible peptide signals up to charge state 8+ (allowing variable methionine oxidation). The computed peptides were matched with the spectra and annotated (mass tolerance  $\pm 5$  ppm). All fitted signals were checked manually for isotope, charge and m/z accuracy. Non-matching annotations were deleted.

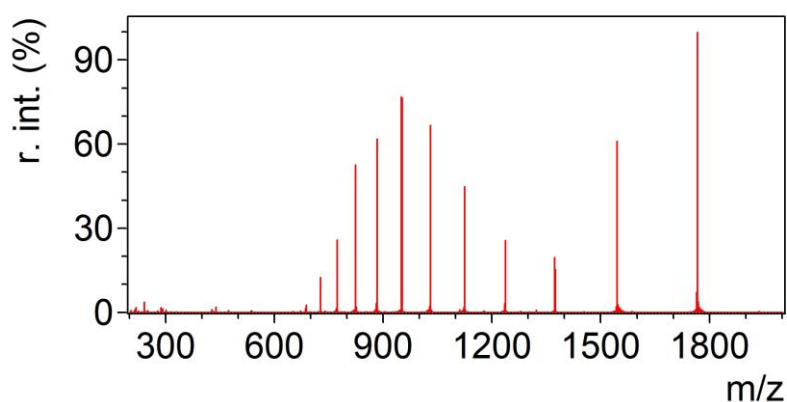

**Figure S1.** ESSI-Spectrum of cytochrome c sample *Cyt3* mixed 1:1 (v/v) with 20% acetic acid.

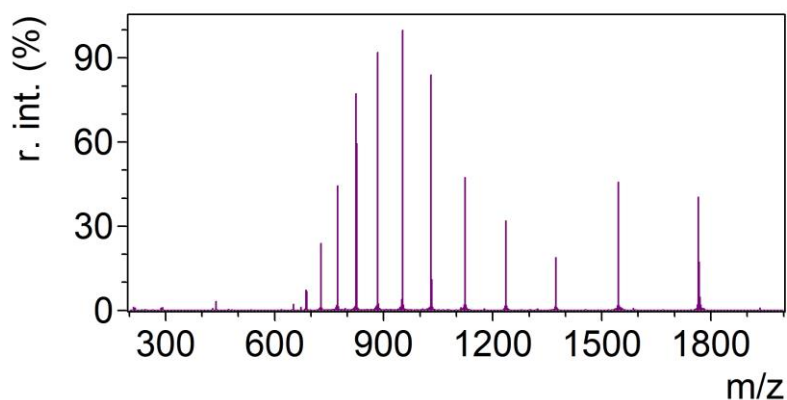

**Figure S2.** ESSI-Spectrum of cytochrome c sample *Cyt3* mixed 1:1 (v/v) with 8% formic acid.

### Annotation of peptides obtained by in-spray digestion of cytochrome c

In-spray digestion of cytochrome c using ESSI-MS<sup>3</sup>: experimental setup as depicted in Figures 1A, S6 and S7, DoE Run N16 showed the best results in terms of sequence coverage at the following settings: flow rate 5  $\mu\text{L}\cdot\text{min}^{-1}$ , 7 cm distance between sprayer and MS inlet, sample *Cyt3*, protease solution *Pep3*, 120 psi nitrogen back pressure. The obtained sequence coverage was 98.1 %, matched intensity was found to be 24.1 %.

Cytochrome c from horse heart: Sequence length 105, average mass 11.880 kDa, single letter code sequence: MGDVEKGKKI FVQKCAQCHT VEKGGKHKTG PNLHGLFGRK TGQAPGFTYT DANKNKGITW KEETLMEYLE NPKKYIPGTK MIFAGIKKKT EREDLIAYLK KATNE

**Table S1.** Annotated peptides found for in-spray digestion of cytochrome c in DoE run N16. Mass tolerance was set to  $\pm 5$  ppm.

| m/z meas. | z | Annotation                             |
|-----------|---|----------------------------------------|
| 402.2345  | 2 | [3-9]g.DVEKGKK.i                       |
| 463.2682  | 3 | [69-80]y.LENPKKYIPGTK.m                |
| 463.2682  | 3 | [84-95]f.AGIKKKTEREDL.i                |
| 483.7668  | 2 | [98-105]a.YLKKATNE.                    |
| 509.7753  | 2 | [38-47]f.GRKTGQAPGF.t                  |
| 509.7753  | 2 | [37-46]l.FGRKTGQAPG.f                  |
| 524.6426  | 3 | [84-97]f.AGIKKKTEREDLI.a               |
| 549.9862  | 3 | [82-95]m.IFAGIKKTEREDL.i               |
| 549.9862  | 3 | [83-96]i.FAGIKKTEREDLI.a               |
| 561.3044  | 3 | [68-81]e.YLENPKKYIPGTKM.i              |
| 575.8275  | 2 | [96-105]l.IAYLKKATNE.                  |
| 602.2832  | 2 | [14-24]q.KCAQCHTVEKG.g                 |
| 611.3598  | 3 | [82-97]m.IFAGIKKTEREDLI.a              |
| 630.6102  | 4 | [84-105]f.AGIKKKTEREDLIAYLKKATNE.      |
| 648.0197  | 3 | [68-83]e.YLENPKKYIPGTKMIF.a            |
| 662.9703  | 5 | [68-95]e.YLENPKKYIPGTKMIFAGIKKTEREDL.i |
| 694.3991  | 2 | [69-80]y.LENPKKYIPGTK.m                |
| 694.3991  | 2 | [84-95]f.AGIKKKTEREDL.i                |
| 695.6486  | 4 | [82-105]m.IFAGIKKTEREDLIAYLKKATNE.     |

|           |   |                                                        |
|-----------|---|--------------------------------------------------------|
| 699.7959  | 5 | [70-99] l.ENPKKYIPGTMIFAGIKKKTEREDLIAYL.k              |
| 699.7959  | 5 | [69-98] y.LENPKKYIPGTMIFAGIKKKTEREDLIAY.l              |
| 699.7959  | 5 | [68-97] e.YLENPKKYIPGTMIFAGIKKKTEREDLIA.y              |
| 714.9864  | 5 | [65-94] t.LMEYLENPKKYIPGTMIFAGIKKKTERED.l              |
| 714.9864  | 5 | [66-95] l.MEYLENPKKYIPGTMIFAGIKKKTEREDL.i              |
| 734.7158  | 3 | [66-83] l.MEYLENPKKYIPGTMIF.a                          |
| 741.2498  | 6 | [67-104] m.EYLENPKKYIPGTMIFAGIKKKTEREDLIAYLKKATN.e     |
| 741.2498  | 6 | [68-105] e.YLENPKKYIPGTMIFAGIKKKTEREDLIAYLKKATNE.      |
| 751.8097  | 5 | [66-97] l.MEYLENPKKYIPGTMIFAGIKKKTEREDLIA.y            |
| 778.65    | 4 | [38-65] f.GRKTGQAPGFTYTDANKNKGITWKEETL.m               |
| 784.5966  | 6 | [66-105] l.MEYLENPKKYIPGTMIFAGIKKKTEREDLIAYLKKATNE.    |
| 786.4593  | 2 | [84-97] f.AGIKKKTEREDLIA.y                             |
| 824.4746  | 2 | [83-96] i.FAGIKKKTEREDLI.a                             |
| 828.4612  | 4 | [68-95] e.YLENPKKYIPGTMIFAGIKKKTEREDL.i                |
| 843.6737  | 4 | [38-67] f.GRKTGQAPGFTYTDANKNKGITWKEETLME.y             |
| 860.7349  | 4 | [68-96] e.YLENPKKYIPGTMIFAGIKKKTEREDLI.a [1xOxidation] |
| 874.4914  | 4 | [68-97] e.YLENPKKYIPGTMIFAGIKKKTEREDLIA.y              |
| 874.4914  | 4 | [69-98] y.LENPKKYIPGTMIFAGIKKKTEREDLIAY.l              |
| 874.4914  | 4 | [70-99] l.ENPKKYIPGTMIFAGIKKKTEREDLIAYL.k              |
| 889.297   | 5 | [67-104] m.EYLENPKKYIPGTMIFAGIKKKTEREDLIAYLKKATN.e     |
| 889.297   | 5 | [68-105] e.YLENPKKYIPGTMIFAGIKKKTEREDLIAYLKKATNE.      |
| 893.4803  | 4 | [65-94] t.LMEYLENPKKYIPGTMIFAGIKKKTERED.l              |
| 893.4803  | 4 | [66-95] l.MEYLENPKKYIPGTMIFAGIKKKTEREDL.i              |
| 927.197   | 3 | [82-105] m.IFAGIKKKTEREDLIAYLKKATNE.                   |
| 939.5118  | 4 | [66-97] l.MEYLENPKKYIPGTMIFAGIKKKTEREDLIA.y            |
| 941.3125  | 5 | [66-105] l.MEYLENPKKYIPGTMIFAGIKKKTEREDLIAYLKKATNE.    |
| 966.5257  | 1 | [98-105] a.YLKKATNE.                                   |
| 971.5269  | 2 | [68-83] e.YLENPKKYIPGTMIF.a                            |
| 980.5207  | 4 | [3-38] g.DVEKGKIFVQKCAQCHTVEKGGKHKTGPNLHGLFG.r         |
| 1037.87   | 3 | [38-65] f.GRKTGQAPGFTYTDANKNKGITWKEETL.m               |
| 1101.5704 | 2 | [66-83] l.MEYLENPKKYIPGTMIF.a                          |
| 1104.2797 | 3 | [68-95] e.YLENPKKYIPGTMIFAGIKKKTEREDL.i                |
| 1111.3697 | 4 | [67-104] m.EYLENPKKYIPGTMIFAGIKKKTEREDLIAYLKKATN.e     |
| 1111.3697 | 4 | [68-105] e.YLENPKKYIPGTMIFAGIKKKTEREDLIAYLKKATNE.      |
| 1143.5936 | 3 | [35-65] h.GLFGRKTGQAPGFTYTDANKNKGITWKEETL.m            |
| 1150.6476 | 1 | [96-105] l.IAYLKKATNE.                                 |
| 1165.6556 | 3 | [69-98] y.LENPKKYIPGTMIFAGIKKKTEREDLIAY.l              |
| 1165.6556 | 3 | [68-97] e.YLENPKKYIPGTMIFAGIKKKTEREDLIA.y              |
| 1165.6556 | 3 | [70-99] l.ENPKKYIPGTMIFAGIKKKTEREDLIAYL.k              |
| 1176.3945 | 4 | [66-105] l.MEYLENPKKYIPGTMIFAGIKKKTEREDLIAYLKKATNE.    |
| 1252.3497 | 3 | [66-97] l.MEYLENPKKYIPGTMIFAGIKKKTEREDLIA.y            |
| 1481.4962 | 3 | [67-104] m.EYLENPKKYIPGTMIFAGIKKKTEREDLIAYLKKATN.e     |
| 1481.4962 | 3 | [68-105] e.YLENPKKYIPGTMIFAGIKKKTEREDLIAYLKKATNE.      |
| 1568.1904 | 3 | [66-105] l.MEYLENPKKYIPGTMIFAGIKKKTEREDLIAYLKKATNE.    |

## Annotation of peptides obtained by in-spray digestion of recombinant RocC<sub>24-126</sub>

In-spray digestion of recombinant RocC<sub>24-126</sub> using ESSI-MS<sup>3</sup>: experimental setup as depicted in Figures 1A, S6 and S7, flow rate was 1  $\mu\text{L}\cdot\text{min}^{-1}$ , 5 cm distance between sprayer and MS inlet, sample RocC1 (approx. 0.26  $\text{mg}\cdot\text{mL}^{-1}$  in 5 mM  $\text{NH}_4\text{HCO}_3$ ), protease solution Pep3, 70 psi nitrogen back pressure. Obtained sequence coverage was 100 %, matched intensity was found to be 60.3 %.

RocC<sub>24-126</sub> (in-house, recombinant with protease tag GPLGS): Sequence length 108, 12.069 kDa average mass, single letter code: GPLGSARSDA LLWLAANFPE AFDNSLRIRP LKIGIMSDIL QHAEKAEQVG VSKSKLREAV VLFTRRLDYL ACLKAREVRI DLHGPNVAEV TEEEAENASM KIKKRVEK

**Table S2.** Annotated peptides found for the in-spray digestion of RocC<sub>24-126</sub>. Mass tolerance was set to  $\pm 5$  ppm.

| m/z meas. | z | Annotation                                                                     |
|-----------|---|--------------------------------------------------------------------------------|
| 399.5923  | 3 | [27-36] l.RIRPLKIGIM.s                                                         |
| 431.2644  | 1 | [11-13] a.LLW.l                                                                |
| 431.2644  | 1 | [12-14] l.LWL.a                                                                |
| 437.287   | 3 | [26-36] s.LRIRPLKIGIM.s                                                        |
| 464.5047  | 4 | [63-77] l.FTRRLDYLA CLKARE.v                                                   |
| 466.9457  | 3 | [27-38] l.RIRPLKIGIMSD.i                                                       |
| 468.7663  | 2 | [64-70] f.TRRLDYL.a                                                            |
| 504.6402  | 3 | [27-39] l.RIRPLKIGIMSDI.l                                                      |
| 504.6402  | 3 | [26-38] s.LRIRPLKIGIMSDI.i                                                     |
| 522.277   | 2 | [1-11] .GPLGSARSDAL.l                                                          |
| 542.3001  | 2 | [62-69] v.LFTRRLDY.l                                                           |
| 542.3001  | 2 | [63-70] l.FTRRLDYL.a                                                           |
| 555.5472  | 4 | [90-108] e.VTEEEAENASM KIKKRVEK.                                               |
| 563.3188  | 4 | [39-58] d.ILQHAEKAEQVG VSKSKLRE.a                                              |
| 574.0513  | 7 | [26-61] s.LRIRPLKIGIMSDILQHAEKAEQVG VSKSKLREAVV.l                              |
| 574.0513  | 7 | [27-62] l.RIRPLKIGIMSDILQHAEKAEQVG VSKSKLREAVV.l                               |
| 578.8189  | 2 | [1-12] .GPLGSARSDALL.w                                                         |
| 585.5032  | 5 | [83-108] l.HGNPVAEVTEEEAENASM KIKKRVEK.                                        |
| 587.4816  | 6 | [78-108] e.VRIDLHGPNVAEVTEEEAENASM KIKKRVEK.                                   |
| 598.8853  | 2 | [27-36] l.RIRPLKIGIM.s                                                         |
| 601.9979  | 3 | [74-89] l.KAREVRIDLHGPNVAE.v                                                   |
| 612.331   | 2 | [64-73] f.TRRLDYLA CL.k                                                        |
| 615.3817  | 1 | [78-82] e.VRIDL.h                                                              |
| 619.0037  | 3 | [63-77] l.FTRRLDYLA CLKARE.v                                                   |
| 629.3229  | 2 | [63-72] l.FTRRLDYLA C.l                                                        |
| 631.9421  | 5 | [63-89] l.FTRRLDYLA CLKAREVRIDLHGPNVAE.v                                       |
| 639.692   | 3 | [73-89] c.LKAREVRIDLHGPNVAE.v                                                  |
| 658.8831  | 4 | [39-62] d.ILQHAEKAEQVG VSKSKLREAVV.l                                           |
| 660.3564  | 2 | [78-89] e.VRIDLHGPNVAE.v                                                       |
| 660.3564  | 2 | [79-90] v.RIDLHGPNVAE.v                                                        |
| 660.3564  | 2 | [77-88] r.EVRIDLHGPNVA.e                                                       |
| 668.1937  | 6 | [74-108] l.KAREVRIDLHGPNVAEVTEEEAENASM KIKKRVEK.                               |
| 669.5581  | 6 | [26-61] s.LRIRPLKIGIMSDILQHAEKAEQVG VSKSKLREAVV.l                              |
| 669.5581  | 6 | [27-62] l.RIRPLKIGIMSDILQHAEKAEQVG VSKSKLREAVV.l                               |
| 670.4848  | 8 | [62-107] v.LFTRRLDYLA CLKAREVRIDLHGPNVAEVTEEEAENASM KIKKRVE.k<br>[1xOxidation] |
| 685.8648  | 2 | [62-72] v.LFTRRLDYLA C.l                                                       |
| 685.8648  | 2 | [63-73] l.FTRRLDYLA CL.k                                                       |
| 695.6495  | 4 | [39-63] d.ILQHAEKAEQVG VSKSKLREAVV.l                                           |

|           |   |                                                                |
|-----------|---|----------------------------------------------------------------|
| 697.7075  | 3 | [71-89] l.ACLKAREVRIDLHGPNVAE.v                                |
| 699.9144  | 2 | [27-38] l.RIRPLKIGIMSD.i                                       |
| 704.7758  | 5 | [78-108] e.VRIDLHGPNVAEVTEEEAENASMKIKRVEK.                     |
| 704.7758  | 5 | [75-105] k.AREVRIDLHGPNVAEVTEEEAENASMKIKR.v                    |
| 709.3965  | 4 | [37-62] m.SDILQHAEKAEQGVGSKSLREAVV.f                           |
| 709.3965  | 4 | [29-54] i.RPLKIGIMSDILQHAEKAEQGVGSKS.k                         |
| 716.0476  | 6 | [71-108] l.ACLKAREVRIDLHGPNVAEVTEEEAENASMKIKRVEK.              |
| 728.3989  | 2 | [1-14] .GPLGSARSDALLWL.a                                       |
| 731.6265  | 4 | [83-108] l.HGPNVAEVTEEEAENASMKIKRVEK.                          |
| 740.3927  | 3 | [90-108] e.VTEEEAENASMKIKRVEK.                                 |
| 746.1635  | 4 | [37-63] m.SDILQHAEKAEQGVGSKSLREAVVLF.t                         |
| 754.7302  | 3 | [74-93] l.KAREVRIDLHGPNVAEVTEE.e                               |
| 765.9813  | 7 | [63-108] l.FTRRLDYLACLKAREVRIDLHGPNVAEVTEEEAENASMKIKRVEK.      |
| 789.6762  | 4 | [63-89] l.FTRRLDYLACLKAREVRIDLHGPNVAE.v                        |
| 799.1556  | 7 | [12-61] l.LWLAANFPEAFDNSLRIRPLKIGIMSDILQHAEKAEQGVGSKSLREAVV.I  |
| 799.1556  | 7 | [13-62] l.WLAANFPEAFDNSLRIRPLKIGIMSDILQHAEKAEQGVGSKSLREAVV.f   |
| 801.6303  | 5 | [74-108] l.KAREVRIDLHGPNVAEVTEEEAENASMKIKRVEK.                 |
| 803.2675  | 5 | [27-62] l.RIRPLKIGIMSDILQHAEKAEQGVGSKSLREAVV.f                 |
| 803.2675  | 5 | [26-61] s.LRIRPLKIGIMSDILQHAEKAEQGVGSKSLREAVV.I                |
| 815.3086  | 7 | [12-62] l.LWLAANFPEAFDNSLRIRPLKIGIMSDILQHAEKAEQGVGSKSLREAVV.f  |
| 815.3086  | 7 | [11-61] a.LLWLAANFPEAFDNSLRIRPLKIGIMSDILQHAEKAEQGVGSKSLREAVV.I |
| 824.2471  | 5 | [73-108] c.LKAREVRIDLHGPNVAEVTEEEAENASMKIKRVEK.                |
| 825.8841  | 5 | [26-62] s.LRIRPLKIGIMSDILQHAEKAEQGVGSKSLREAVV.f                |
| 859.0562  | 5 | [71-108] l.ACLKAREVRIDLHGPNVAEVTEEEAENASMKIKRVEK.              |
| 878.174   | 3 | [39-62] d.IQHAEKAEQGVGSKSLREAVV.f                              |
| 880.7174  | 4 | [78-108] e.VRIDLHGPNVAEVTEEEAENASMKIKRVEK.                     |
| 880.7174  | 4 | [75-105] k.AREVRIDLHGPNVAEVTEEEAENASMKIKR.v                    |
| 882.3185  | 6 | [14-61] w.LAANFPEAFDNSLRIRPLKIGIMSDILQHAEKAEQGVGSKSLREAVV.I    |
| 882.3185  | 6 | [15-62] l.AANFPEAFDNSLRIRPLKIGIMSDILQHAEKAEQGVGSKSLREAVV.f     |
| 892.4681  | 3 | [15-38] l.AANFPEAFDNSLRIRPLKIGIMSD.i                           |
| 902.4922  | 2 | [74-89] l.KAREVRIDLHGPNVAE.v                                   |
| 908.5202  | 3 | [49-72] q.VGVGSKSLREAVVLFTRRLDYLAC.I                           |
| 916.5159  | 3 | [38-62] s.DILQHAEKAEQGVGSKSLREAVV.f                            |
| 916.5159  | 3 | [29-53] i.RPLKIGIMSDILQHAEKAEQGVGSKS.s                         |
| 918.5185  | 5 | [22-62] a.FDNSLRIRPLKIGIMSDILQHAEKAEQGVGSKSLREAVV.f            |
| 918.5185  | 5 | [23-63] f.DNSLRIRPLKIGIMSDILQHAEKAEQGVGSKSLREAVVLF.t           |
| 924.8355  | 3 | [13-36] l.WLAANFPEAFDNSLRIRPLKIGIM.s                           |
| 927.1973  | 3 | [39-63] d.IQHAEKAEQGVGSKSLREAVVLF.t                            |
| 928.0018  | 2 | [63-77] l.FTRRLDYLACLKARE.v                                    |
| 932.1803  | 6 | [12-61] l.LWLAANFPEAFDNSLRIRPLKIGIMSDILQHAEKAEQGVGSKSLREAVV.I  |
| 932.1803  | 6 | [13-62] l.WLAANFPEAFDNSLRIRPLKIGIMSDILQHAEKAEQGVGSKSLREAVV.f   |
| 945.5266  | 3 | [37-62] m.SDILQHAEKAEQGVGSKSLREAVV.f                           |
| 945.5266  | 3 | [29-54] i.RPLKIGIMSDILQHAEKAEQGVGSKS.k                         |
| 951.0258  | 6 | [11-61] a.LLWLAANFPEAFDNSLRIRPLKIGIMSDILQHAEKAEQGVGSKSLREAVV.I |
| 951.0258  | 6 | [12-62] l.LWLAANFPEAFDNSLRIRPLKIGIMSDILQHAEKAEQGVGSKSLREAVV.f  |
| 953.8486  | 3 | [13-37] l.WLAANFPEAFDNSLRIRPLKIGIM.s                           |
| 962.5306  | 3 | [12-36] l.LWLAANFPEAFDNSLRIRPLKIGIM.s                          |
| 988.0431  | 2 | [22-38] a.FDNSLRIRPLKIGIMSD.i                                  |
| 992.1894  | 3 | [13-38] l.WLAANFPEAFDNSLRIRPLKIGIMSD.i                         |
| 994.55    | 3 | [37-63] m.SDILQHAEKAEQGVGSKSLREAVVLF.t                         |
| 1001.7867 | 4 | [74-108] l.KAREVRIDLHGPNVAEVTEEEAENASMKIKRVEK.                 |
| 1003.8326 | 4 | [26-61] s.LRIRPLKIGIMSDILQHAEKAEQGVGSKSLREAVV.I                |
| 1003.8326 | 4 | [27-62] l.RIRPLKIGIMSDILQHAEKAEQGVGSKSLREAVV.f                 |
| 1018.4966 | 1 | [13-21] l.WLAANFPEA.f                                          |
| 1029.8843 | 3 | [12-38] l.LWLAANFPEAFDNSLRIRPLKIGIMSD.i                        |
| 1032.1044 | 4 | [26-62] s.LRIRPLKIGIMSDILQHAEKAEQGVGSKSLREAVV.f                |

|           |   |                                                                              |
|-----------|---|------------------------------------------------------------------------------|
| 1041.9611 | 5 | [13-58] i.WLAANFPEAFDNSLRIRPLKIGIMSDILQHAEKAEQVGVSJKLRE.a                    |
| 1043.5452 | 1 | [1-11] .GPLGSARSDAL.I                                                        |
| 1052.5654 | 3 | [63-89] i.FTRRLDYLACLKAREVRIDLHGPNVAE.v                                      |
| 1058.5824 | 5 | [15-62] i.AANFPEAFDNSLRIRPLKIGIMSDILQHAEKAEQVGVSJKLREAVV.f                   |
| 1058.5824 | 5 | [14-61] w.LAANFPEAFDNSLRIRPLKIGIMSDILQHAEKAEQVGVSJKLREAVV.I                  |
| 1064.5872 | 5 | [11-57] a.LLWLAANFPEAFDNSLRIRPLKIGIMSDILQHAEKAEQVGVSJKLRE.e<br>[1xOxidation] |
| 1064.5872 | 5 | [12-58] i.LWLAANFPEAFDNSLRIRPLKIGIMSDILQHAEKAEQVGVSJKLRE.a                   |
| 1071.9703 | 5 | [63-108] i.FTRRLDYLACLKAREVRIDLHGPNVAEVTEEEAENASMKIKRVEK.                    |
| 1073.5692 | 4 | [71-108] i.ACLKAREVRIDLHGPNVAEVTEEEAENASMKIKRVEK.                            |
| 1083.5921 | 1 | [62-69] v.LFTRRLDY.I                                                         |
| 1083.5921 | 1 | [63-70] i.FTRRLDY.a                                                          |
| 1118.4151 | 5 | [12-61] i.LWLAANFPEAFDNSLRIRPLKIGIMSDILQHAEKAEQVGVSJKLREAVV.I                |
| 1118.4151 | 5 | [13-62] i.WLAANFPEAFDNSLRIRPLKIGIMSDILQHAEKAEQVGVSJKLREAVV.f                 |
| 1131.5825 | 1 | [12-21] i.LWLAANFPEA.f                                                       |
| 1141.0311 | 5 | [11-61] a.LLWLAANFPEAFDNSLRIRPLKIGIMSDILQHAEKAEQVGVSJKLREAVV.I               |
| 1141.0311 | 5 | [12-62] i.LWLAANFPEAFDNSLRIRPLKIGIMSDILQHAEKAEQVGVSJKLREAVV.f                |
| 1156.6291 | 1 | [1-12] .GPLGSARSDALL.w                                                       |
| 1165.5665 | 1 | [13-22] i.WLAANFPEAF.d                                                       |
| 1173.9557 | 3 | [78-108] e.VRIDLHGPNVAEVTEEEAENASMKIKRVEK.                                   |
| 1188.1325 | 2 | [73-93] c.LKAREVRIDLHGPNVAEVTEE.e                                            |
| 1205.6342 | 4 | [1-44] .GPLGSARSDALLWLAANFPEAFDNSLRIRPLKIGIMSDILQHA.E.k [1xOxidation]        |
| 1223.655  | 1 | [64-73] f.TRRLDYLACL.k                                                       |
| 1257.6382 | 1 | [63-72] i.FTRRLDYLAC.I                                                       |
| 1295.5874 | 1 | [14-25] w.LAANFPEAFDNS.I                                                     |
| 1295.5874 | 1 | [15-26] i.AANFPEAFDNS.r                                                      |
| 1316.7594 | 2 | [39-62] d.IQHAEKAEQVGVSJKLREAVV.f                                            |
| 1319.7061 | 1 | [77-88] r.EVRIDLHGPNVA.e                                                     |
| 1319.7061 | 1 | [78-89] e.VRIDLHGPNVAE.v                                                     |
| 1319.7061 | 1 | [79-90] v.RIDLHGPNVAE.v                                                      |
| 1322.979  | 4 | [14-61] w.LAANFPEAFDNSLRIRPLKIGIMSDILQHAEKAEQVGVSJKLREAVV.I                  |
| 1322.979  | 4 | [15-62] i.AANFPEAFDNSLRIRPLKIGIMSDILQHAEKAEQVGVSJKLREAVV.f                   |
| 1335.3819 | 3 | [74-108] i.KAREVRIDLHGPNVAEVTEEEAENASMKIKRVEK.                               |
| 1338.112  | 3 | [26-61] s.LRIRPLKIGIMSDILQHAEKAEQVGVSJKLREAVV.I                              |
| 1338.112  | 3 | [27-62] i.RIRPLKIGIMSDILQHAEKAEQVGVSJKLREAVV.f                               |
| 1339.7417 | 4 | [33-79] k.IGIMSDILQHAEKAEQVGVSJKLREAVVLFTRRLDYLACLKAREVR.i<br>[1xOxidation]  |
| 1370.7241 | 1 | [62-72] v.LFTRRLDYLAC.I                                                      |
| 1370.7241 | 1 | [63-73] i.FTRRLDYLACL.k                                                      |
| 1373.0769 | 3 | [36-71] i.MSDILQHAEKAEQVGVSJKLREAVVLFTRRLDYLA.c [1xOxidation]                |
| 1373.0769 | 3 | [73-108] c.LKAREVRIDLHGPNVAEVTEEEAENASMKIKRVEK.                              |
| 1386.7541 | 2 | [13-36] i.WLAANFPEAFDNSLRIRPLKIGIM.s                                         |
| 1390.2917 | 2 | [39-63] d.IQHAEKAEQVGVSJKLREAVV.f                                            |
| 1397.7701 | 4 | [12-61] i.LWLAANFPEAFDNSLRIRPLKIGIMSDILQHAEKAEQVGVSJKLREAVV.I                |
| 1397.7701 | 4 | [13-62] i.WLAANFPEAFDNSLRIRPLKIGIMSDILQHAEKAEQVGVSJKLREAVV.f                 |
| 1417.7884 | 2 | [37-62] m.SDILQHAEKAEQVGVSJKLREAVV.f                                         |
| 1417.7884 | 2 | [29-54] i.RPLKIGIMSDILQHAEKAEQVGVS.K                                         |
| 1426.0414 | 4 | [11-61] a.LLWLAANFPEAFDNSLRIRPLKIGIMSDILQHAEKAEQVGVSJKLREAVV.I               |
| 1426.0414 | 4 | [12-62] i.LWLAANFPEAFDNSLRIRPLKIGIMSDILQHAEKAEQVGVSJKLREAVV.f                |
| 1431.0911 | 3 | [71-108] i.ACLKAREVRIDLHGPNVAEVTEEEAENASMKIKRVEK.                            |
| 1443.297  | 2 | [12-36] i.LWLAANFPEAFDNSLRIRPLKIGIM.s                                        |
| 1455.7971 | 1 | [1-14] .GPLGSARSDALLWL.a                                                     |
| 1481.669  | 1 | [13-25] i.WLAANFPEAFDNS.I                                                    |
| 1487.7849 | 2 | [13-38] i.WLAANFPEAFDNSLRIRPLKIGIMSD.i                                       |
| 1544.3245 | 2 | [12-38] i.LWLAANFPEAFDNSLRIRPLKIGIMSD.i                                      |
| 1544.3245 | 2 | [13-39] i.WLAANFPEAFDNSLRIRPLKIGIMSD.I                                       |

|           |   |                            |
|-----------|---|----------------------------|
| 1594.754  | 1 | [12-25]I.LWLAANFPEAFDNS.I  |
| 1594.754  | 1 | [13-26]I.WLAANFPEAFDNSL.r  |
| 1707.8404 | 1 | [11-25]a.LLWLAANFPEAFDNS.I |
| 1707.8404 | 1 | [12-26]I.LWLAANFPEAFDNSL.r |

### Design of Experiment (DoE) screening

For the DoE screening model, the input parameters were set as flow rate (1, 2.5, 5  $\mu\text{l}\cdot\text{min}^{-1}$ ), distance (3, 5, 7 cm), sample solution (Cyt1, Cyt2, Cyt3), protease solution (Pep1, Pep2, Pep3), N2 pressure (60, 90, 120 psi). Output parameters were defined: sequence coverage, matched intensity, number of identified peptides, average peptide length. A half fractional factorial interaction model with 3 center points was used, giving a 5+ resolution design with 19 runs in total.

**Table S3.** Experimental parameters and results of DoE runs.

| Exp Name | Run Order | Flow rate / $\mu\text{l}\cdot\text{min}^{-1}$ | Distance /cm | Sample solution | Protease solution | Gas pressure /psi | Sequence coverage /% | Matched intensity /% | Number of peptides detected | Average peptide length |
|----------|-----------|-----------------------------------------------|--------------|-----------------|-------------------|-------------------|----------------------|----------------------|-----------------------------|------------------------|
| N1       | 3         | 1                                             | 3            | Cyt1            | Pep1              | 120               | 39                   | 11.2                 | 33                          | 29                     |
| N2       | 15        | 5                                             | 3            | Cyt1            | Pep1              | 60                | 39                   | 1.2                  | 9                           | 36                     |
| N3       | 11        | 1                                             | 7            | Cyt1            | Pep1              | 60                | 39                   | 10.8                 | 34                          | 29                     |
| N4       | 1         | 5                                             | 7            | Cyt1            | Pep1              | 120               | 39                   | 7.2                  | 24                          | 29                     |
| N5       | 8         | 1                                             | 3            | Cyt3            | Pep1              | 60                | 39                   | 6.6                  | 32                          | 28                     |
| N6       | 10        | 5                                             | 3            | Cyt3            | Pep1              | 120               | 39                   | 4                    | 17                          | 32                     |
| N7       | 2         | 1                                             | 7            | Cyt3            | Pep1              | 120               | 39                   | 12                   | 32                          | 30                     |
| N8       | 19        | 5                                             | 7            | Cyt3            | Pep1              | 60                | 39                   | 3.2                  | 15                          | 33                     |
| N9       | 16        | 1                                             | 3            | Cyt1            | Pep3              | 60                | 51.4                 | 4.7                  | 27                          | 33                     |
| N10      | 14        | 5                                             | 3            | Cyt1            | Pep3              | 120               | 39                   | 8.8                  | 27                          | 29                     |
| N11      | 18        | 1                                             | 7            | Cyt1            | Pep3              | 120               | 39                   | 23.7                 | 40                          | 29                     |
| N12      | 17        | 5                                             | 7            | Cyt1            | Pep3              | 60                | 39                   | 8.7                  | 28                          | 31                     |
| N13      | 12        | 1                                             | 3            | Cyt3            | Pep3              | 120               | 45.7                 | 17.5                 | 53                          | 27                     |
| N14      | 13        | 5                                             | 3            | Cyt3            | Pep3              | 60                | 40                   | 5.3                  | 35                          | 30                     |
| N15      | 4         | 1                                             | 7            | Cyt3            | Pep3              | 60                | 96.2                 | 13.2                 | 50                          | 27                     |
| N16      | 5         | 5                                             | 7            | Cyt3            | Pep3              | 120               | 98.1                 | 24.7                 | 65                          | 25                     |
| N17      | 9         | 2.5                                           | 5            | Cyt2            | Pep2              | 90                | 39                   | 11.9                 | 25                          | 31                     |
| N18      | 6         | 2.5                                           | 5            | Cyt2            | Pep2              | 90                | 42.9                 | 11.1                 | 25                          | 28                     |
| N19      | 7         | 2.5                                           | 5            | Cyt2            | Pep2              | 90                | 43.8                 | 7.9                  | 21                          | 28                     |

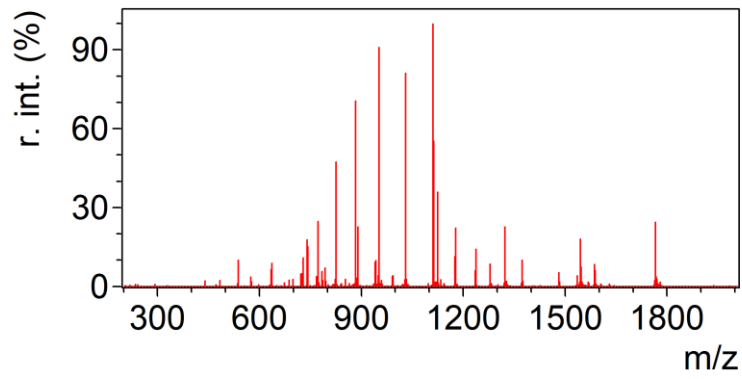

**Figure S3.** ESSI-MS spectrum of the worst performing DoE run (N2) of in-spray digestion of cytochrome c. Experimental setup as depicted in Figure 1A, flow rate was  $5 \mu\text{L}\cdot\text{min}^{-1}$ , 3 cm distance between sprayer and MS inlet, sample *Cyt1*, protease solution *Pep1*, 60 psi nitrogen back pressure.

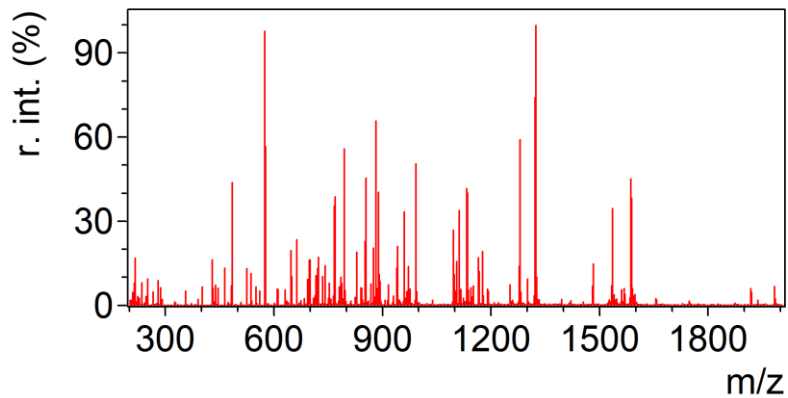

**Figure S4.** ESSI-MS spectrum of the best performing DoE run (N16) of in-spray digestion of cytochrome c. Experimental setup as depicted in Figure 1A flow rate was  $5 \mu\text{L}\cdot\text{min}^{-1}$ , 7 cm distance between sprayer and MS inlet, sample *Cyt3*, protease solution *Pep3*, 120 psi nitrogen back pressure.



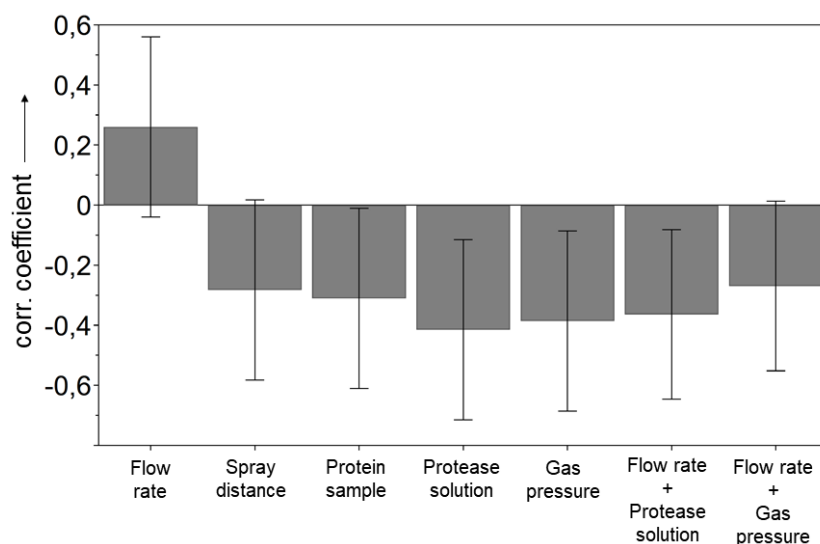

**Figure S5.** Result of DoE screening. Normalized coefficients plot for the output variable average peptide length obtained by an analysis of 19 randomized runs ( $R^2 = 0.80$ ,  $N = 19$ ,  $DF = 11$ , confidence: 95%). For further details see the Experimental Section and Tables S3 and S5.

**Table S4.** DoE analysis wizard (MODDE<sup>®</sup> Pro 12) information for the output variable sequence coverage.

| Sequence coverage          | Coeff. SC | Std. Err. | P            | Conf. int(±) |
|----------------------------|-----------|-----------|--------------|--------------|
| Constant                   | 46.6368   | 0.997194  | 4.67767e-12  | 2.25583      |
| Flow rate                  | -0.954595 | 1.02452   | 0.375785     | 2.31764      |
| Distance                   | 5.66864   | 1.02452   | 0.000364334  | 2.31764      |
| Sample solution            | 6.57609   | 1.02452   | 0.00012255   | 2.31764      |
| Protease solution          | 8.03745   | 1.02452   | 2.58686e-05  | 2.31764      |
| Gas pressure               | -0.282843 | 1.02452   | 0.788726     | 2.31764      |
| Flow rate*Gas pressure     | 6.72222   | 0.965926  | 6.61559e-05  | 2.1851       |
| Distance*Sample solution   | 6.72222   | 0.965926  | 6.6156e-05   | 2.1851       |
| Distance*Protease solution | 5.34445   | 0.965926  | 0.000364334  | 2.1851       |
| Sample*Protease solution   | 6.2       | 0.965926  | 0.000122551  | 2.1851       |
| N = 19                     | Q2 =      | 0.691     | Cond. no. =  | 1.061        |
| DF = 9                     | R2 =      | 0.971     | RSD =        | 4.347        |
| Comp. = 1                  | R2 adj. = | 0.942     | Confidence = | 0.95         |

**Table S5.** DoE analysis wizard (MODDE<sup>®</sup> Pro 12) information for the output variable average peptide length.

| Average peptide length      | Coeff. SC | Std. Err. | P            | Conf. int(±) |
|-----------------------------|-----------|-----------|--------------|--------------|
| Constant                    | 29.6037   | 0.342325  | 6.16342e-17  | 0.753442     |
| Flow rate                   | 0.671751  | 0.351705  | 0.0825427    | 0.774088     |
| Distance                    | -0.729498 | 0.351705  | 0.062322     | 0.774088     |
| Sample solution             | -0.802567 | 0.351705  | 0.0433888    | 0.774088     |
| Protease solution           | -1.07245  | 0.351705  | 0.0110618    | 0.774088     |
| Gas pressure                | -0.997021 | 0.351705  | 0.0162316    | 0.774088     |
| Flow rate*Protease solution | -0.94     | 0.331591  | 0.0162316    | 0.729817     |
| Flow rate*Gas pressure      | -0.695556 | 0.331591  | 0.0598451    | 0.729818     |
| N = 19                      | Q2 =      | 0.547     | Cond. no. =  | 1.061        |
| DF = 11                     | R2 =      | 0.796     | RSD =        | 1.492        |
| Comp. = 1                   | R2 adj. = | 0.666     | Confidence = | 0.95         |

## Experimental Setup

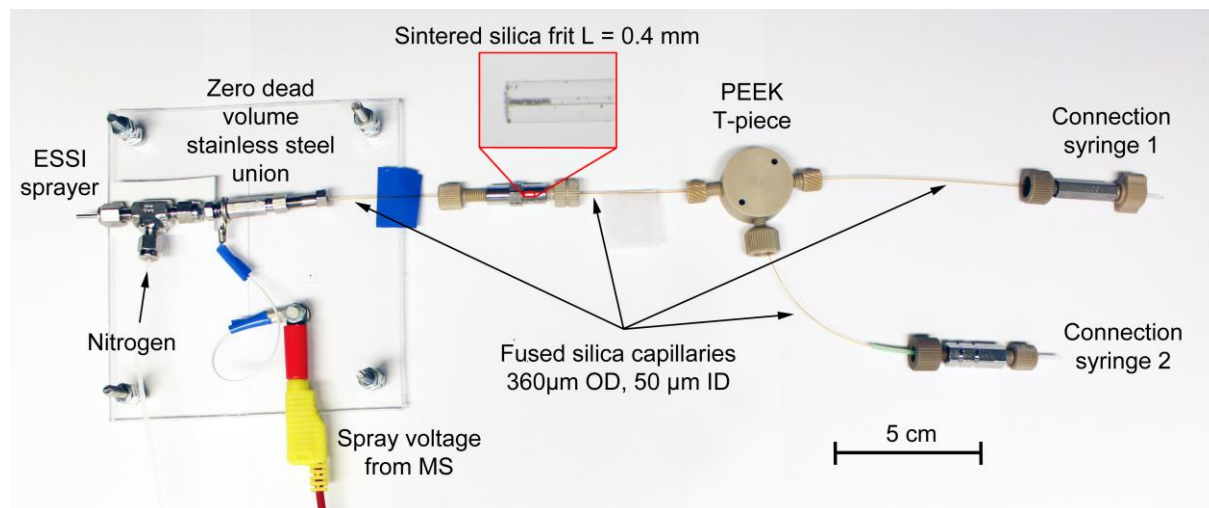

**Figure S6.** Experimental setup for accelerated pepsin digestion of proteins utilizing ESSI-MS. The ESSI sprayer was orthogonally placed in front of the inlet of the mass spectrometer. The sintered frit was produced by tipping the tap of a fused silica capillary (360 μm OD, 50 μm ID) into Silica gel 60 for column chromatography (15 - 40 μm bead size; Merck, Germany). Sintering was performed by heating the packed section for approx. 10 seconds using a yellow glowing platinum wire. Excess silica beads were removed by flushing the capillary with deionized water.

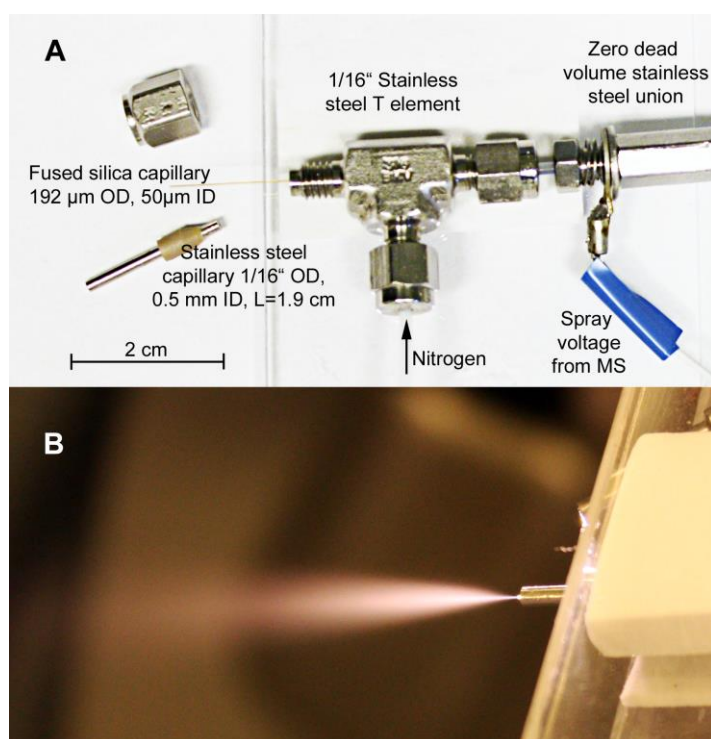

**Figure S7.** Top: Assembly of the modified ESSI sprayer according to Takáts et al.<sup>3</sup> Bottom: Photograph of the observed plume at the tip of the ESSI sprayer.

### Control experiments

**Bulk digestion of cytochrome c.** A vial containing 50  $\mu\text{l}$  of cytochrome c solution was heated to 95°C for 5 min for denaturation. After cooling to room temperature, 50  $\mu\text{l}$  of the pepsin solution was added. The vial was mixed using a vortex mixer. After incubation for 3 hours at 37°C using a water bath, the sample was stored at -20°C until ESSI-MS analysis.

**Quenching experiment.** Experimental setup as depicted in Figure 1B. The two syringes were filled with protein solution *Cyt3* as well as protease solutions *Pep3*. 100  $\mu\text{l}$  ammonia 0.5% quenching buffer (pH = 11.4 at 22°C) were placed in an Eppendorf vial on top of a vortex mixer. At a total flow rate of 2.5  $\mu\text{l}\cdot\text{min}^{-1}$  (1.25  $\mu\text{l}\cdot\text{min}^{-1}$  for each syringe) the stream of liquid was directed into the vial containing the quenching solution. Within 10 min 25  $\mu\text{l}$  of the eluting reaction mixture were collected in the quenching buffer, the final pH was checked with pH test strips and found to be approx. pH = 8.0. A 50  $\mu\text{l}$  aliquot of the quenched solution was re-acidified with 10  $\mu\text{l}$  of 8% formic acid (to final pH  $\sim$  4.5) and submitted to ESSI-MS analysis. Considering the inner volume of a 16 cm, 50  $\mu\text{m}$  i.d. capillary of approx. 0.3  $\mu\text{l}$ , at a flowrate of 2.5  $\mu\text{l}\cdot\text{min}^{-1}$ , it takes the mixture around 7.5 seconds to pass the capillary from the mixing silica frit into the quenching solution, where the enzyme is irreversibly inactivated. Hence, we assume a reaction time for the digestion in solution of approx. 7.5 sec at a flow rate of 2.5  $\mu\text{l}\cdot\text{min}^{-1}$ .

### References

- (1) Chambers, M. C.; Maclean, B.; Burke, R.; Amodei, D.; Ruderman, D. L.; Neumann, S.;

- Gatto, L.; Fischer, B.; Pratt, B.; Egertson, J.; Hoff, K.; Kessner, D.; Tasman, N.; Shulman, N.; Frewen, B.; Baker, T. A.; Brusniak, M.-Y.; Paulse, C.; Creasy, D.; Flashner, L.; Kani, K.; Moulding, C.; Seymour, S. L.; Nuwaysir, L. M.; Lefebvre, B.; Kuhlmann, F.; Roark, J.; Rainer, P.; Detlev, S.; Hemenway, T.; Huhmer, A.; Langridge, J.; Connolly, B.; Chadick, T.; Holly, K.; Eckels, J.; Deutsch, E. W.; Moritz, R. L.; Katz, J. E.; Agus, D. B.; MacCoss, M.; Tabb, D. L.; Mallick, P. A Cross-Platform Toolkit for Mass Spectrometry and Proteomics. *Nat. Biotechnol.* **2012**, *30* (10), 918–920. <https://doi.org/10.1038/nbt.2377>.
- (2) Niedermeyer, T. H. J.; Strohm, M. MMass as a Software Tool for the Annotation of Cyclic Peptide Tandem Mass Spectra. *PLoS One* **2012**, *7* (9), e44913. <https://doi.org/10.1371/journal.pone.0044913>.
- (3) Takáts, Z.; Wiseman, J. M.; Gologan, B.; Cooks, R. G. Electrosonic Spray Ionization. A Gentle Technique for Generating Folded Proteins and Protein Complexes in the Gas Phase and for Studying Ion–Molecule Reactions at Atmospheric Pressure. *Anal. Chem.* **2004**, *76* (14), 4050–4058. <https://doi.org/10.1021/ac049848m>.
